# Supplementary material
Source: PubMed Central journal article supplement (PMC5107347)

Supplementary Table 1 - Summary of Single Nucleotide Polymorphisms Analyzed for Pro- and Anti-Inflammatory Cytokine Genes and the Growth Mixture Model Analysis for Fatigue and Energy Scores

| Gene          | SNP        | Position  | Chr | MAF   | Alleles | Fatigue    |         |       | Energy     |         |       |
|---------------|------------|-----------|-----|-------|---------|------------|---------|-------|------------|---------|-------|
|               |            |           |     |       |         | Chi Square | p-value | Model | Chi Square | p-value | Model |
| <i>IFNG1</i>  | rs2069728  | 68154003  | 12  | 0.110 | G>A     | 1.023      | 0.6     | A     | 2.337      | 0.311   | A     |
| <i>IFNG1</i>  | rs2069727  | 68154442  | 12  | 0.384 | A>G     | 0.138      | 0.933   | A     | 0.051      | 0.975   | A     |
| <i>IFNG1</i>  | rs2069718  | 68156381  | 12  | 0.494 | C>T     | FE         | 0.035   | R     | 1.001      | 0.606   | A     |
| <i>IFNG1</i>  | rs1861493  | 68157415  | 12  | 0.266 | A>G     | 1.528      | 0.466   | A     | 1.205      | 0.547   | A     |
| <i>IFNG1</i>  | rs1861494  | 68157628  | 12  | 0.273 | T>C     | 1.841      | 0.398   | A     | 1.073      | 0.585   | A     |
| <i>IFNG1</i>  | rs2069709  | 68159922  | 12  | 0.003 | G>T     | n/a        | n/a     | n/a   | n/a        | n/a     | n/a   |
| <i>IFNG1</i>  | HapA3      |           |     |       |         | 1.618      | 0.445   |       | 1.374      | 0.503   |       |
| <i>IFNG1</i>  | HapA5      |           |     |       |         | 0.126      | 0.939   |       | 0.013      | 0.994   |       |
| <i>IFNGR1</i> | rs9376268  | 137211613 | 6   | 0.254 | G>A     | 1.053      | 0.591   | A     | 1.974      | 0.373   | A     |
| <i>IL1B</i>   | rs1071676  | 112829855 | 2   | 0.189 | G>C     | 1.467      | 0.48    | A     | 2.505      | 0.286   | A     |
| <i>IL1B</i>   | rs1143643  | 112830724 | 2   | 0.383 | G>A     | 0.478      | 0.787   | A     | 1.647      | 0.439   | A     |
| <i>IL1B</i>   | rs1143642  | 112830975 | 2   | 0.082 | C>T     | 0.065      | 0.968   | A     | 0.384      | 0.825   | A     |
| <i>IL1B</i>   | rs1143634  | 112832812 | 2   | 0.187 | C>T     | 1.22       | 0.543   | A     | 2.183      | 0.336   | A     |
| <i>IL1B</i>   | rs1143633  | 112832889 | 2   | 0.392 | G>A     | 0.745      | 0.689   | A     | 1.722      | 0.423   | A     |
| <i>IL1B</i>   | rs1143630  | 112834077 | 2   | 0.115 | C>A     | 2.466      | 0.291   | A     | 3.457      | 0.178   | A     |
| <i>IL1B</i>   | rs3917356  | 112834785 | 2   | 0.450 | G>A     | 1.293      | 0.524   | A     | 0.129      | 0.938   | A     |
| <i>IL1B</i>   | rs1143629  | 112835940 | 2   | 0.389 | T>C     | FE         | 0.011   | R     | 2.111      | 0.348   | A     |
| <i>IL1B</i>   | rs1143627  | 112836809 | 2   | 0.397 | T>C     | FE         | 0.005   | R     | 1.985      | 0.371   | A     |
| <i>IL1B</i>   | rs16944    | 112837289 | 2   | 0.386 | G>A     | FE         | 0.002   | R     | 1.898      | 0.387   | A     |
| <i>IL1B</i>   | rs1143623  | 112838251 | 2   | 0.277 | G>C     | FE         | 0.028   | D     | 1.045      | 0.593   | A     |
| <i>IL1B</i>   | rs13032029 | 112842837 | 2   | 0.448 | C>T     | 0.91       | 0.634   | A     | 0.042      | 0.979   | A     |
| <i>IL1B</i>   | HapA1      |           |     |       |         | 2.056      | 0.358   |       | 1.243      | 0.537   |       |
| <i>IL1B</i>   | HapA4      |           |     |       |         | 0.389      | 0.823   |       | 1.456      | 0.483   |       |
| <i>IL1B</i>   | HapA6      |           |     |       |         | 1.26       | 0.533   |       | 2.27       | 0.321   |       |
| <i>IL1B</i>   | HapB1      |           |     |       |         | 4.747      | 0.093   |       | 4.443      | 0.108   |       |
| <i>IL1B</i>   | HapB6      |           |     |       |         | 4.185      | 0.123   |       | 0.243      | 0.885   |       |
| <i>IL1B</i>   | HapB8      |           |     |       |         | 0.783      | 0.676   |       | 0.2        | 0.905   |       |
| <i>IL1R1</i>  | rs949963   | 102153325 | 2   | 0.223 | G>A     | 2.084      | 0.353   | A     | 3.995      | 0.136   | A     |
| <i>IL1R1</i>  | rs2228139  | 102165188 | 2   | 0.053 | C>G     | 0.721      | 0.697   | A     | 3.402      | 0.182   | A     |
| <i>IL1R1</i>  | rs3917320  | 102176414 | 2   | 0.047 | A>C     | n/a        | n/a     | n/a   | n/a        | n/a     | n/a   |

|       |            |           |   |       |     |       |       |     |       |       |     |
|-------|------------|-----------|---|-------|-----|-------|-------|-----|-------|-------|-----|
| IL1R1 | rs2110726  | 102177821 | 2 | 0.317 | C>T | 1.581 | 0.454 | A   | FE    | 0.021 | D   |
| IL1R1 | rs3917332  | 102180063 | 2 | 0.187 | A>T | 0.322 | 0.851 | A   | 2.011 | 0.366 | A   |
| IL1R1 | HapA1      |           |   |       |     | 1.487 | 0.475 |     | 5.074 | 0.079 |     |
| IL1R1 | HapA2      |           |   |       |     | 0.227 | 0.892 |     | 3.965 | 0.138 |     |
| IL1R1 | HapA3      |           |   |       |     | 0.296 | 0.863 |     | 1.974 | 0.373 |     |
| IL1R2 | rs4141134  | 101990063 | 2 | 0.362 | T>C | 0.508 | 0.776 | A   | 0.035 | 0.983 | A   |
| IL1R2 | rs11674595 | 101994529 | 2 | 0.258 | T>C | 0.111 | 0.946 | A   | 1.184 | 0.553 | A   |
| IL1R2 | rs7570441  | 102000532 | 2 | 0.408 | G>A | 0.241 | 0.886 | A   | 0.027 | 0.986 | A   |
| IL1R2 | HapA1      |           |   |       |     | 0.342 | 0.843 |     | 0.014 | 0.993 |     |
| IL1R2 | HapA2      |           |   |       |     | FE    | 0.697 |     | FE    | 0.076 |     |
| IL1R2 | HapA4      |           |   |       |     | 0.152 | 0.927 |     | 0.631 | 0.73  |     |
| IL2   | rs1479923  | 122449231 | 4 | 0.308 | C>T | 2.05  | 0.359 | A   | 1.065 | 0.587 | A   |
| IL2   | rs2069776  | 122450820 | 4 | 0.184 | T>C | n/a   | n/a   | n/a | n/a   | n/a   | n/a |
| IL2   | rs2069772  | 122451977 | 4 | 0.241 | A>G | 1.242 | 0.538 | A   | 1.377 | 0.502 | A   |
| IL2   | rs2069777  | 122455281 | 4 | 0.047 | C>T | n/a   | n/a   | n/a | n/a   | n/a   | n/a |
| IL2   | rs2069763  | 122456326 | 4 | 0.277 | T>G | 0.921 | 0.631 | A   | 1.067 | 0.587 | A   |
| IL2   | HapA1      |           |   |       |     | 0.767 | 0.681 |     | 0.005 | 0.997 |     |
| IL2   | HapA2      |           |   |       |     | 0.998 | 0.607 |     | 1.142 | 0.565 |     |
| IL2   | HapA3      |           |   |       |     | 1.242 | 0.538 |     | 1.377 | 0.502 |     |
| IL4   | rs2243248  | 132672951 | 5 | 0.086 | T>G | 3.529 | 0.171 | A   | 3.142 | 0.208 | A   |
| IL4   | rs2243250  | 132673461 | 5 | 0.269 | C>T | n/a   | n/a   | n/a | n/a   | n/a   | n/a |
| IL4   | rs2070874  | 132674017 | 5 | 0.245 | C>T | n/a   | n/a   | n/a | n/a   | n/a   | n/a |
| IL4   | rs2227284  | 132677032 | 5 | 0.387 | C>A | n/a   | n/a   | n/a | n/a   | n/a   | n/a |
| IL4   | rs2227282  | 132677486 | 5 | 0.390 | C>G | n/a   | n/a   | n/a | n/a   | n/a   | n/a |
| IL4   | rs2243263  | 132677606 | 5 | 0.124 | C>G | 2.202 | 0.333 | A   | 0.503 | 0.778 | A   |
| IL4   | rs2243266  | 132678096 | 5 | 0.237 | G>A | n/a   | n/a   | n/a | n/a   | n/a   | n/a |
| IL4   | rs2243267  | 132678193 | 5 | 0.237 | G>C | n/a   | n/a   | n/a | n/a   | n/a   | n/a |
| IL4   | rs2243274  | 132679139 | 5 | 0.261 | G>A | n/a   | n/a   | n/a | n/a   | n/a   | n/a |
| IL4   | HapA1      |           |   |       |     | 2.802 | 0.246 |     | 0.001 | 0.999 |     |
| IL4   | HapA3      |           |   |       |     | 4.5   | 0.105 |     | 1.053 | 0.591 |     |
| IL4   | HapX1      |           |   |       |     | 2.618 | 0.27  |     | 1.635 | 0.441 |     |
| IL6   | rs4719714  | 22721093  | 7 | 0.255 | A>T | 1.51  | 0.47  | A   | 0.05  | 0.975 | A   |
| IL6   | rs2069827  | 22725836  | 7 | 0.069 | G>T | 1.768 | 0.413 | A   | 2.118 | 0.347 | A   |
| IL6   | rs1800796  | 22726626  | 7 | 0.134 | C>G | n/a   | n/a   | n/a | n/a   | n/a   | n/a |
| IL6   | rs1800795  | 22727025  | 7 | 0.285 | C>G | 0.989 | 0.61  | A   | 0.045 | 0.978 | A   |
| IL6   | rs2069835  | 22728251  | 7 | 0.061 | T>C | n/a   | n/a   | n/a | n/a   | n/a   | n/a |
| IL6   | rs2066992  | 22728629  | 7 | 0.049 | G>T | 2.819 | 0.244 | A   | 2.43  | 0.297 | A   |

|       |            |           |   |       |     |       |       |     |       |       |     |
|-------|------------|-----------|---|-------|-----|-------|-------|-----|-------|-------|-----|
| IL6   | rs2069840  | 22728952  | 7 | 0.333 | C>G | 3.081 | 0.214 | A   | 1.747 | 0.418 | A   |
| IL6   | rs1554606  | 22729087  | 7 | 0.319 | G>T | 1.668 | 0.434 | A   | 0.306 | 0.858 | A   |
| IL6   | rs2069845  | 22730529  | 7 | 0.319 | A>G | 1.668 | 0.434 | A   | 0.306 | 0.858 | A   |
| IL6   | rs2069849  | 22731536  | 7 | 0.024 | C>T | n/a   | n/a   | n/a | n/a   | n/a   | n/a |
| IL6   | rs2069861  | 22732034  | 7 | 0.056 | C>T | 0.405 | 0.817 | A   | 0.813 | 0.666 | A   |
| IL6   | rs35610689 | 22734200  | 7 | 0.259 | A>G | 0.946 | 0.623 | A   | 0.323 | 0.851 | A   |
| IL6   | HapA1      |           |   |       |     | 0     | 1     |     | 0.118 | 0.943 |     |
| IL6   | HapA5      |           |   |       |     | 3.247 | 0.197 |     | 2.979 | 0.225 |     |
| IL6   | HapA8      |           |   |       |     | 1.254 | 0.534 |     | 0.476 | 0.788 |     |
| CXCL8 | rs4073     | 73740306  | 4 | 0.455 | T>A | 0.347 | 0.841 | A   | 0.419 | 0.811 | A   |
| CXCL8 | rs2227306  | 73741337  | 4 | 0.366 | C>T | 0.146 | 0.93  | A   | 0.459 | 0.795 | A   |
| CXCL8 | rs2227543  | 73742192  | 4 | 0.368 | C>T | 0.38  | 0.827 | A   | 1.086 | 0.581 | A   |
| CXCL8 | HapA1      |           |   |       |     | 0.347 | 0.841 |     | 0.419 | 0.811 |     |
| CXCL8 | HapA4      |           |   |       |     | 0.174 | 0.916 |     | 0.764 | 0.682 |     |
| IL10  | rs3024505  | 206766558 | 1 | 0.129 | C>T | 1.126 | 0.57  | A   | 2.853 | 0.24  | A   |
| IL10  | rs3024498  | 206768183 | 1 | 0.204 | A>G | 3.233 | 0.199 | A   | 0.811 | 0.667 | A   |
| IL10  | rs3024496  | 206768518 | 1 | 0.421 | T>C | FE    | 0.007 | R   | 3.195 | 0.202 | A   |
| IL10  | rs1878672  | 206770367 | 1 | 0.416 | G>C | FE    | 0.043 | D   | 1.593 | 0.451 | A   |
| IL10  | rs3024492  | 206770766 | 1 | 0.190 | T>A | n/a   | n/a   | n/a | n/a   | n/a   | n/a |
| IL10  | rs1518111  | 206771299 | 1 | 0.303 | G>A | 0.417 | 0.812 | A   | 0.387 | 0.824 | A   |
| IL10  | rs1518110  | 206771515 | 1 | 0.301 | G>T | 0.334 | 0.846 | A   | 0.433 | 0.806 | A   |
| IL10  | rs3024491  | 206771700 | 1 | 0.408 | G>T | FE    | 0.043 | D   | 1.588 | 0.452 | A   |
| IL10  | HapA1      |           |   |       |     | 0.662 | 0.718 |     | 0.386 | 0.824 |     |
| IL10  | HapA2      |           |   |       |     | 2.763 | 0.251 |     | 1.535 | 0.464 |     |
| IL10  | HapA8      |           |   |       |     | 2.276 | 0.321 |     | 0.896 | 0.639 |     |
| IL13  | rs1881457  | 132656716 | 5 | 0.210 | A>C | 1.785 | 0.41  | A   | 1.576 | 0.455 | A   |
| IL13  | rs1800925  | 132657116 | 5 | 0.233 | C>T | 1.553 | 0.46  | A   | 0.846 | 0.655 | A   |
| IL13  | rs2069743  | 132657582 | 5 | 0.019 | A>G | n/a   | n/a   | n/a | n/a   | n/a   | n/a |
| IL13  | rs1295686  | 132660150 | 5 | 0.265 | G>A | 0.192 | 0.908 | A   | 0.329 | 0.848 | A   |
| IL13  | rs20541    | 132660271 | 5 | 0.212 | C>T | 2.79  | 0.248 | A   | 0.12  | 0.942 | A   |
| IL13  | HapA1      |           |   |       |     | 0.22  | 0.896 |     | 0.434 | 0.805 |     |
| IL13  | HapA4      |           |   |       |     | 2.713 | 0.258 |     | 0.055 | 0.973 |     |
| IL17A | rs4711998  | 52185554  | 6 | 0.346 | G>A | 1.467 | 0.48  | A   | 0.579 | 0.749 | A   |
| IL17A | rs8193036  | 52185694  | 6 | 0.327 | T>C | 0.515 | 0.773 | A   | 4.504 | 0.105 | A   |
| IL17A | rs3819024  | 52185987  | 6 | 0.372 | A>G | 1.807 | 0.405 | A   | 0.585 | 0.746 | A   |
| IL17A | rs2275913  | 52186234  | 6 | 0.361 | G>A | 1.41  | 0.494 | A   | 1.466 | 0.48  | A   |
| IL17A | rs3804513  | 52188398  | 6 | 0.023 | A>T | n/a   | n/a   | n/a | n/a   | n/a   | n/a |

|               |            |           |    |       |     |       |       |     |       |       |     |
|---------------|------------|-----------|----|-------|-----|-------|-------|-----|-------|-------|-----|
| <i>IL17A</i>  | rs7747909  | 52189450  | 6  | 0.217 | G>A | 1.944 | 0.378 | A   | 1.28  | 0.527 | A   |
| <i>NFKB1</i>  | rs3774933  | 102505181 | 4  | 0.409 | T>C | 1.182 | 0.554 | A   | 0.182 | 0.913 | A   |
| <i>NFKB1</i>  | rs170731   | 102527745 | 4  | 0.358 | A>T | 0.01  | 0.995 | A   | 1.261 | 0.532 | A   |
| <i>NFKB1</i>  | rs17032779 | 102545092 | 4  | 0.011 | T>C | n/a   | n/a   | n/a | n/a   | n/a   | n/a |
| <i>NFKB1</i>  | rs230510   | 102555008 | 4  | 0.410 | T>A | 1.51  | 0.47  | A   | 0.505 | 0.777 | A   |
| <i>NFKB1</i>  | rs230494   | 102565811 | 4  | 0.434 | A>G | 0.296 | 0.863 | A   | 1.145 | 0.564 | A   |
| <i>NFKB1</i>  | rs4648016  | 102568512 | 4  | 0.010 | C>T | n/a   | n/a   | n/a | n/a   | n/a   | n/a |
| <i>NFKB1</i>  | rs4648018  | 102569042 | 4  | 0.018 | G>C | n/a   | n/a   | n/a | n/a   | n/a   | n/a |
| <i>NFKB1</i>  | rs3774956  | 102587368 | 4  | 0.435 | C>T | 0.088 | 0.957 | A   | 0.889 | 0.641 | A   |
| <i>NFKB1</i>  | rs10489114 | 102590230 | 4  | 0.018 | A>G | n/a   | n/a   | n/a | n/a   | n/a   | n/a |
| <i>NFKB1</i>  | rs4648068  | 102597147 | 4  | 0.363 | A>G | 0.179 | 0.914 | A   | 1.87  | 0.393 | A   |
| <i>NFKB1</i>  | rs4648095  | 102606718 | 4  | 0.052 | T>C | FE    | 0.569 | A   | FE    | 0.845 | A   |
| <i>NFKB1</i>  | rs4648110  | 102612663 | 4  | 0.170 | T>A | 2.318 | 0.314 | A   | 0.215 | 0.898 | A   |
| <i>NFKB1</i>  | rs4648135  | 102615512 | 4  | 0.061 | A>G | FE    | 1     | A   | FE    | 0.363 | A   |
| <i>NFKB1</i>  | rs4648141  | 102615743 | 4  | 0.180 | G>A | 3.513 | 0.173 | A   | 0.595 | 0.743 | A   |
| <i>NFKB1</i>  | rs1609798  | 102616284 | 4  | 0.337 | C>T | 0.181 | 0.914 | A   | 2.13  | 0.345 | A   |
| <i>NFKB1</i>  | HapA1      |           |    |       |     | 1.352 | 0.509 |     | 0.375 | 0.829 |     |
| <i>NFKB1</i>  | HapA9      |           |    |       |     | 0.142 | 0.931 |     | 1.569 | 0.456 | A   |
| <i>NFKB2</i>  | rs12772374 | 102397153 | 10 | 0.168 | A>G | 3.607 | 0.165 | A   | 2.116 | 0.347 | A   |
| <i>NFKB2</i>  | rs7897947  | 102397953 | 10 | 0.221 | T>G | 0.347 | 0.841 | A   | 2.07  | 0.355 | A   |
| <i>NFKB2</i>  | rs11574849 | 102399938 | 10 | 0.070 | G>A | 3.945 | 0.139 | A   | 5.765 | 0.056 | A   |
| <i>NFKB2</i>  | rs1056890  | 102403012 | 10 | 0.305 | C>T | 0.576 | 0.75  | A   | 2.212 | 0.331 | A   |
| <i>TNF SF</i> | rs2857602  | 31565600  | 6  | 0.341 | T>C | 0.872 | 0.647 | A   | 0.711 | 0.701 | A   |
| <i>TNF SF</i> | rs1800683  | 31572293  | 6  | 0.390 | G>A | 1.416 | 0.493 | A   | 2.762 | 0.251 | A   |
| <i>TNF SF</i> | rs2239704  | 31572363  | 6  | 0.335 | G>T | 0.327 | 0.849 | A   | 1.369 | 0.504 | A   |
| <i>TNF SF</i> | rs2229094  | 31572778  | 6  | 0.278 | T>C | 1.012 | 0.603 | A   | 4.703 | 0.095 | A   |
| <i>TNF SF</i> | rs1041981  | 31573006  | 6  | 0.386 | C>A | 1.222 | 0.543 | A   | 2.796 | 0.247 | A   |
| <i>TNF SF</i> | rs1799964  | 31574530  | 6  | 0.224 | T>C | 1.033 | 0.597 | A   | 1.34  | 0.512 | A   |
| <i>TNF SF</i> | rs1800750  | 31575185  | 6  | 0.016 | G>A | n/a   | n/a   | n/a | n/a   | n/a   | n/a |
| <i>TNF SF</i> | rs1800629  | 31575253  | 6  | 0.149 | G>A | 1.951 | 0.377 | A   | 4.037 | 0.133 | A   |
| <i>TNF SF</i> | rs1800610  | 31576049  | 6  | 0.100 | C>T | 1.088 | 0.58  | A   | 0.153 | 0.926 | A   |
| <i>TNF SF</i> | rs3093662  | 31576411  | 6  | 0.074 | A>G | 2.262 | 0.323 | A   | 1.228 | 0.541 | A   |
| <i>TNF SF</i> | HapA1      |           |    |       |     | 0.28  | 0.869 |     | 2.259 | 0.323 |     |
| <i>TNF SF</i> | HapA5      |           |    |       |     | 0.198 | 0.906 |     | 1.134 | 0.567 |     |
| <i>TNF SF</i> | HapA6      |           |    |       |     | 0.017 | 0.991 |     | 2.877 | 0.237 |     |

A = additive model, Chr = chromosome (GRCh38 human reference assembly), D = dominant model, Hap = haplotype, IFNG = interferon gamma, IL = interleukin, MAF = minor allele frequency, n/a = not assayed because SNP violated Hardy-Weinberg expectations ( $p < 0.001$ ) or because MAF

was  $<.05$ , NF $\kappa$ B = nuclear factor kappa beta, R = recessive model, SNP= single nucleotide polymorphism, TNF SF = tumor necrosis factor superfamily

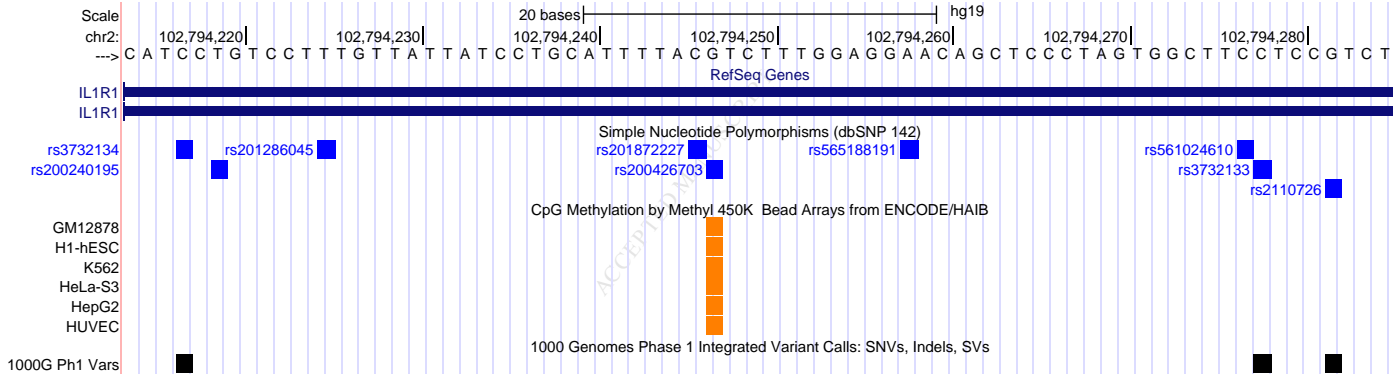

Supplement: NIHMS825037-supplement-supplement_1.pdf [file NIHMS825037-supplement-supplement_1.pdf]
